# Supplementary material for: An Insight into Knowledge, Perspective, and Practices of Indian Optometrists towards Childhood Myopia
Source: MDPI journal article supplement (doi:10.3390/vision8020022), 2024-04-16
Supplement: s1 [file s1]

# Supplementary Materials: An insight into knowledge, perspective, and practices of Indian optometrists towards childhood myopia

Archana Naik, Siddharth K. Karthikeyan, Jivitha Jyothi Ramesh, Shwetha Bhaskar, Chinnappa A. Ganapathi, Sayantan Biswas

Supplementary table S1: Predictive factors for optometrists involving childhood myopia management based on their primary place of practice.

| Categories                                                                | Hospital |            |         | Academic institution |           |         | Independent (private) practice |            |         | Corporate practice |            |         | Optometrist pursuing PG |            |         |
|---------------------------------------------------------------------------|----------|------------|---------|----------------------|-----------|---------|--------------------------------|------------|---------|--------------------|------------|---------|-------------------------|------------|---------|
|                                                                           | OR       | 95% CI     | p-value | OR                   | 95% CI    | p-value | OR                             | 95% CI     | p-value | OR                 | 95% CI     | p-value | OR                      | 95% CI     | p-value |
| <b>Routine Eye Examination</b>                                            |          |            |         |                      |           |         |                                |            |         |                    |            |         |                         |            |         |
| Cover test                                                                | 2.83     | 1.78-4.51  | <0.001  | 2.94                 | 2.01-4.32 | <0.001  | 2.68                           | 1.85-3.90  | <0.001  | 3.36               | 2.32-4.88  | <0.001  | 3.13                    | 2.18-4.49  | <0.001  |
| Cycloplegic retinoscopy                                                   | 5.57     | 3.15-9.84  | <0.001  | 5.57                 | 3.5-8.87  | <0.001  | 6.78                           | 4.13-11.10 | <0.001  | 7.26               | 4.50-11.70 | <0.001  | 6.67                    | 4.21-10.50 | <0.001  |
| Cycloplegic subjective refraction                                         | 2.17     | 1.40-3.37  | 0.001   | 2.63                 | 1.81-3.82 | <0.001  | 2.33                           | 1.63-3.35  | <0.001  | 2.57               | 1.81-3.64  | <0.001  | 2.50                    | 1.78-3.52  | <0.001  |
| Dilated retinal fundus examination                                        | 2.29     | 1.47-3.56  | <0.001  | 2.94                 | 2.01-4.32 | <0.001  | 4.19                           | 2.75-6.37  | <0.001  | 3.62               | 2.47-5.29  | <0.001  | 3.47                    | 2.40-5.03  | <0.001  |
| Non cycloplegic retinoscopy                                               | 1.56     | 1.02-2.36  | 0.039   | 1.76                 | 1.24-2.49 | 0.001   | 1.86                           | 1.31-2.63  | <0.001  | 1.62               | 1.17-2.23  | 0.003   | 1.64                    | 1.19-2.25  | 0.002   |
| Non cycloplegic subjective refraction                                     | 1.56     | 1.02-2.36  | 0.039   | 1.76                 | 1.24-2.49 | 0.001   | 1.80                           | 1.27-2.54  | 0.001   | 1.57               | 1.14-2.17  | 0.006   | 1.56                    | 1.13-2.13  | 0.006   |
| Note patient family history of myopia                                     | 9.22     | 4.64-18.30 | <0.001  | 4.75                 | 3.06-7.38 | <0.001  | 4.83                           | 3.11-7.50  | <0.001  | 5.04               | 3.31-7.67  | <0.001  | 5.19                    | 3.41-7.90  | <0.001  |
| <b>Practitioners' engagement with the attender</b>                        |          |            |         |                      |           |         |                                |            |         |                    |            |         |                         |            |         |
| Always discuss options other than glasses for managing the child's myopia | 0.88     | 0.50-1.54  | 0.652   | 2.3                  | 1.15-4.70 | 0.020   | 0.67                           | 0.33-1.33  | 0.251   | 0.868              | 0.32-2.37  | 0.781   | 1.47                    | 0.44-5.08  | 0.531   |
| <b>Considering risk factors</b>                                           |          |            |         |                      |           |         |                                |            |         |                    |            |         |                         |            |         |
| Patient's age                                                             | 0.54     | 0.30-0.95  | 0.033   | 3.27                 | 1.46-8.14 | 0.006   | 1.06                           | 0.51-2.27  | 0.868   | 1.12               | 0.43-3.16  | 0.818   | 0.85                    | 0.29-2.69  | 0.768   |
| Patient's ethnicity                                                       | 0.56     | 0.32-0.95  | 0.034   | 2.13                 | 1.08-4.25 | 0.031   | 1.80                           | 0.87-3.76  | 0.114   | 1.01               | 0.42-2.43  | 0.990   | 1.57                    | 0.52-4.76  | 0.420   |
| <b>Interventions</b>                                                      |          |            |         |                      |           |         |                                |            |         |                    |            |         |                         |            |         |
| Advice to increase time spent outdoors                                    | 2.83     | 1.78-4.51  | <0.001  | 2.45                 | 1.7-3.54  | <0.001  | 2.78                           | 1.91-4.05  | <0.001  | 2.92               | 2.04-4.19  | <0.001  | 2.66                    | 1.88-3.76  | <0.001  |
| Low-moderate dose 0.01%-0.5% atropine eye drops                           | 1.87     | 1.22-2.88  | 0.004   | 1.82                 | 1.28-2.57 | 0.001   | 2.26                           | 1.58-3.23  | <0.001  | 2.41               | 1.71-3.40  | <0.001  | 2.22                    | 1.59-3.10  | <0.001  |

|                                                                                                                                |      |           |              |      |           |                  |      |           |                  |       |            |                  |      |           |                  |
|--------------------------------------------------------------------------------------------------------------------------------|------|-----------|--------------|------|-----------|------------------|------|-----------|------------------|-------|------------|------------------|------|-----------|------------------|
| Visual hygiene e.g., taking regular breaks with prolonged near work maintaining appropriate working distance and good lighting | 1.97 | 1.28-3.03 | <b>0.002</b> | 1.94 | 1.36-2.75 | <b>&lt;0.001</b> | 2.04 | 1.44-2.91 | <b>&lt;0.001</b> | 1.80  | 1.30-2.50  | <b>&lt;0.001</b> | 1.93 | 1.39-2.67 | <b>&lt;0.001</b> |
| <b>Source of education and information</b>                                                                                     |      |           |              |      |           |                  |      |           |                  |       |            |                  |      |           |                  |
| Systematic review and meta-analyses, Cochrane reviews                                                                          | 1.04 | 0.60-1.81 | 0.886        | 2.62 | 1.27-5.59 | <b>0.010</b>     | 0.53 | 0.26-1.08 | 0.079            | 0.809 | 0.32-2.09  | 0.655            | 0.65 | 0.19-2.30 | 0.491            |
| Textbooks                                                                                                                      | 1.39 | 0.80-2.43 | 0.238        | 0.47 | 0.24-0.92 | <b>0.028</b>     | 0.87 | 0.43-1.73 | 0.681            | 1.80  | 0.68-4.96  | 0.242            | 0.45 | 0.14-1.37 | 0.158            |
| <b>Frequencies of interventions</b>                                                                                            |      |           |              |      |           |                  |      |           |                  |       |            |                  |      |           |                  |
| Single vision distance (under-correction)                                                                                      | 1.52 | 0.88-2.62 | 0.132        | 0.44 | 0.22-0.87 | <b>0.020</b>     | 0.54 | 0.28-1.05 | 0.070            | 1.42  | 0.53-3.73  | 0.474            | 0.72 | 0.23-2.20 | 0.564            |
| Bifocal lenses                                                                                                                 | 2.34 | 1.30-4.23 | <b>0.005</b> | 0.62 | 0.29-1.29 | 0.215            | 0.72 | 0.33-1.51 | 0.387            | 0.38  | 0.10-1.05  | 0.108            | 0.87 | 0.25-2.72 | 0.816            |
| <b>Awareness about complication</b>                                                                                            |      |           |              |      |           |                  |      |           |                  |       |            |                  |      |           |                  |
| Retinal Break                                                                                                                  | 1.79 | 1.17-2.74 | <b>0.008</b> | 2.14 | 1.49-3.06 | <b>&lt;0.001</b> | 2.11 | 1.48-3.01 | <b>&lt;0.001</b> | 2.14  | 1.53-2.99  | <b>&lt;0.001</b> | 1.98 | 1.43-2.75 | <b>&lt;0.001</b> |
| <b>Barriers for myopia management</b>                                                                                          |      |           |              |      |           |                  |      |           |                  |       |            |                  |      |           |                  |
| Insufficient support from workplace                                                                                            | 0.63 | 0.37-1.08 | 0.091        | 2.72 | 1.36-5.56 | <b>0.005</b>     | 0.74 | 0.38-1.43 | 0.366            | 1.30  | 0.507-3.35 | 0.586            | 1.90 | 0.56-6.74 | 0.309            |
| Minimal financial incentive                                                                                                    | 1.77 | 1.03-3.04 | <b>0.038</b> | 1.07 | 0.54-2.11 | 0.848            | 0.55 | 0.27-1.10 | 0.09             | 0.95  | 0.39-2.31  | 0.91             | 1.35 | 0.40-4.60 | 0.624            |

PG: Post graduation
